# Supplementary material
Source: publisher site journal article supplement (https://www.spandidos-publications.com/3292/downloadSupplementary)

Figure S1. Expression levels of ET<sub>A</sub>R and ET<sub>B</sub>R in BPH patient samples. The images indicate the immunostaining and localization of ET<sub>A</sub>R and ET<sub>B</sub>R in BPH patient samples. (A) Immunoexpression of ET<sub>A</sub>R was localized in epithelial and stromal cells. (B) Immunoexpression of ET<sub>B</sub>R was mainly located in epithelial cells. Scale bar, 100  $\mu$ m. BPH, benign prostatic hyperplasia; ET<sub>A</sub>R, endothelin A receptor; ET<sub>B</sub>R, endothelin B receptor.

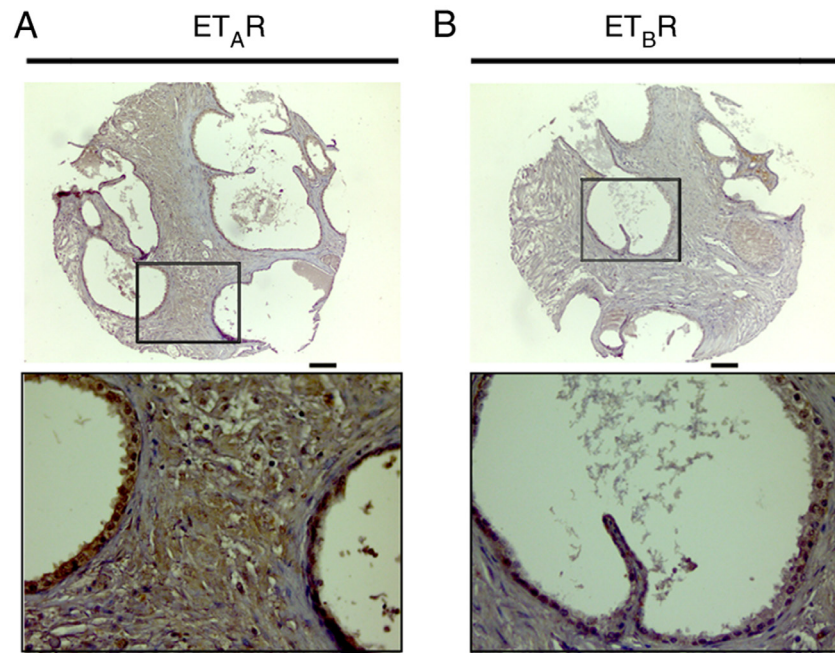

Supplement: Supplementary file 1 [file downloadSupplementary]
